RESEARCH ARTICLE

# Time of Initiating Enzyme Replacement Therapy Affects Immune Abnormalities and Disease Severity in Patients with Gaucher Disease

Renuka Pudi Limgala<sup>1,2\*</sup>, Chidima Ioanou<sup>1</sup>, Matthew Plassmeyer<sup>2</sup>, Mark Ryherd<sup>2</sup>, Lina Kozhaya<sup>3</sup>, Lauren Austin<sup>2</sup>, Cem Abidoglu<sup>3</sup>, Derya Unutmaz<sup>3</sup>, Oral Alpan<sup>2</sup>, Ozlem Goker-Alpan<sup>1</sup>

**1** Lysosomal and Rare Disorders Research and Treatment Center, Fairfax, Virginia, United States of America, **2** Amerimmune, O and O Alpan, LLC, Fairfax, Virginia, United States of America, **3** Jackson Laboratory for Genomic Medicine, Farmington, Connecticut, United States of America

\* [rlimgala@ldrtc.org](mailto:rlimgala@ldrtc.org)

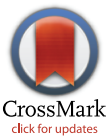

**OPEN ACCESS**

**Citation:** Limgala RP, Ioanou C, Plassmeyer M, Ryherd M, Kozhaya L, Austin L, et al. (2016) Time of Initiating Enzyme Replacement Therapy Affects Immune Abnormalities and Disease Severity in Patients with Gaucher Disease. *PLoS ONE* 11(12): e0168135. doi:10.1371/journal.pone.0168135

**Editor:** Andrea Dardis, Azienda Ospedaliero-Universitaria Santa Maria della Misericordia, ITALY

**Received:** May 9, 2016

**Accepted:** November 24, 2016

**Published:** December 12, 2016

**Copyright:** © 2016 Limgala et al. This is an open access article distributed under the terms of the [Creative Commons Attribution License](https://creativecommons.org/licenses/by/4.0/), which permits unrestricted use, distribution, and reproduction in any medium, provided the original author and source are credited.

**Data Availability Statement:** All relevant data are within the paper and its Supporting Information files.

**Funding:** Amerimmune, O & O Alpan, LLC provided support in the form of salaries to authors [RPL, MP, MR, LA and OA], but did not have any additional role in the study design, data collection and analysis, decision to publish, or preparation of the manuscript. The specific roles of these authors are articulated in the 'author contributions' section.

## Abstract

Gaucher disease (GD) patients often present with abnormalities in immune response that may be the result of alterations in cellular and/or humoral immunity. However, how the treatment and clinical features of patients impact the perturbation of their immunological status remains unclear. To address this, we assessed the immune profile of 26 GD patients who were part of an enzyme replacement therapy (ERT) study. Patients were evaluated clinically for onset of GD symptoms, duration of therapy and validated outcome measures for ERT. According to DS3 disease severity scoring system criteria, they were assigned to have mild, moderate or severe GD. Flow cytometry based immunophenotyping was performed to analyze subsets of T, B, NK, NKT and dendritic cells. GD patients showed multiple types of immune abnormalities associated to T and B lymphocytes with respect to their subpopulations as well as memory and activation markers. Skewing of CD4 and CD8 T cell numbers resulting in lower CD4/CD8 ratio and an increase in overall T cell activation were observed. A decrease in the overall B cells and an increase in NK and NKT cells were noted in the GD patients compared to controls. These immune alterations do not correlate with GD clinical type or level of biomarkers. However, subjects with persistent immune alterations, especially in B cells and DCs correlate with longer delay in initiation of ERT ( $\Delta$ TX). Thus, while ERT may reverse some of these immune abnormalities, the immune cell alterations become persistent if therapy is further delayed. These findings have important implications in understanding the immune disruptions before and after treatment of GD patients.

## Introduction

Gaucher disease (GD) is caused by a genetic deficiency of the lysosomal enzyme, glucocerebrosidase leading to accumulation of glycosphingolipids in various organ systems, most notably in cells of mononuclear phagocyte system. As a result, most of the immune studies in GD

**Competing Interests:** Financial support from Amerimmune, O & O Alpan, LLC in the form of salaries and Sanofi-Genzyme in the form of grant funding do not alter our adherence to all PLOS ONE policies on sharing data and materials.

**Abbreviations:** GD, Gaucher disease; NK cells, Natural killer cells; APCs, Antigen presenting cells; ERT, Enzyme replacement therapy; DS3, Disease severity score;  $\Delta$ TX, Delay in initiation of therapy; ICF, Informed consent form; PBMcs, Peripheral blood mononuclear cells; M, Male; F, Female; SX, Age at which symptoms manifested; TX, Age at which treatment for GD was initiated; Th, T helper cells; Tc, Cytotoxic T cells; Ig, Immunoglobulin; NKT cells, Natural killer T cells; iNKT cells, invariant Natural killer T cells; DCs, Dendritic cells; WBCs, White blood cells; IRB, Internal review board.

patients have been focused on monocyte/macrophage lineage [1, 2]. However considering that clinical manifestations of GD affect various organ systems, it is important to understand possible dysregulations in major immune cell subsets, such as T-/B- lymphocytes, natural killer (NK) cells and dendritic cells. Moreover, most of the studies relating immune dysfunctions in GD have been performed on animal models. Studies on B-cell abnormalities have been limited to predisposition for monoclonal gammopathies and multiple myeloma in GD [3, 4]. Secretion of several chemotactic factors and corresponding immunological cell invasion has been demonstrated in murine model [5]. Major disease effectors are believed to be cells of macrophage lineage because of their secretion of numerous cytokines and chemokines that influence other poorly defined immunological cell populations. Increases in several such populations were identified in a Gba1 mouse model of GD including antigen presenting cells (APCs), i.e., macrophages, dendritic cells, neutrophils, and T helper cells. Elevated activation of T cells and APCs has also been shown [6]. Even though animal models recapitulating GD have been a source for investigating underlying cellular mechanisms; it is not clear how these findings translate to patients with GD.

Macrophage directed Enzyme replacement therapy (ERT) has been the most accepted form of treatment for GD [7–9]. Therapeutic goals for patients with GD on ERT have been well established, and involve changes in liver and spleen size, improvement in hematological parameters, bone pain and bone crises [10, 11]. However, less than 50% of patients with GD on therapy are expected to meet all these therapeutic goals [12]. Similar to the outcome measures, for monitoring GD patients, a validated disease severity scoring system (DS3) has been defined earlier [13, 14]. This system included data from bone, hematologic and visceral domains, individual items from routine assessments and bone evaluations.

In the present study we determined the immune alterations that persist in GD patients despite ERT and how they relate to individual DS3 scores. We also assessed the role of delay in initiation of therapy ( $\Delta$ TX) in GD patients, which can correlate with symptoms like avascular necrosis and other complications [15, 16], versus immune alterations.

## Materials and Methods

### Subjects

The handling of tissue samples and patient data was approved by the internal review board (Copernicus Group Independent Review Board) (NCT01358188) including the procedure whereby all patients gave informed consent to participate in this study. Written informed consent was obtained using IRB approved informed consent form (ICF). This procedure was documented via an informed consent progress note which is stored with the original ICF and any other applicable source documents. Of the 31 enrolled subjects with confirmed GD, the immunologic effects of enzyme replacement therapy (ERT) on immunity were assessed in 26 patients (19F/8M, mean age 41yr). Patients were assessed clinically for onset of GD symptoms, duration of therapy, as well as other validated outcome measures for ERT including hematological parameters, presence of liver and spleen enlargement, bone involvement, and for other comorbidities as previously described [10] and then were assigned at their current state to have mild, moderate and severe GD according to DS3 disease severity scoring system [13].

### Immunophenotyping

Direct immunofluorescence with specific antibodies was performed either on peripheral blood or from isolated peripheral blood mononuclear cells (PBMcs) as previously described [17–19]. For staining from whole blood, 100ul of washed blood was used per tube, and samples were acquired on Accuri C6 flow cytometer (BD Bioscience, San Jose, CA) and analyzed using

FCS express software (De Novo software, Glendale, CA). For staining using PBMCs, 400,000 cells were used per tube and acquired on LSR II (BD Bioscience, San Jose, CA), while analysis was performed using FlowJo analysis software (FlowJo LLC, Ashland, OR). Detailed gating strategies and identification of major subpopulations is described in supporting data (S1–S5 Figs).

## Statistical analysis

All statistical analysis was performed using GraphPad Prism software (GraphPad Software, Inc., La Jolla, CA). Individual fractions of each cell type from GD patients were compared to normal values calculated from non-GD age and gender matched controls ( $n = 9$ ) and graphs were generated as Box & Whisker (Tukey) plots. Scatter plots were used for correlation graphs. Pearson correlation was performed to analyze linear relation between  $\Delta$ TX and DS3 scores. P-values were calculated using two-tailed unpaired Student's t-test. \*:  $P < 0.05$ ; \*\*:  $P < 0.01$ ; \*\*\*:  $P < 0.001$ .

## Results

### Clinical study/scoring

Thirty one patients with confirmed GD were enrolled in an IRB approved study (8M: 23F). Demographics and clinical characteristics are summarized in Table 1. Ages at which the symptoms started manifesting (SX), and age at which the treatment for GD was initiated (TX) are noted. There is a lack of accurate assessment of disease burden at the onset of symptoms, however considering that the subjects start therapy when the symptoms become severe, delay in ERT ( $\Delta$ TX) calculated as the years between TX and SX was taken as one of the parameters of disease burden. For subject ids 13, 29 and 31, who were not under any therapy for GD at the time of study,  $\Delta$ TX was calculated as the years between current age and SX. Each patient was clinically evaluated for various disease domains including bone disease, hematologic parameters and visceral involvement including organomegaly and GD related pulmonary disease. A disease severity score (DS3) was ascertained for each patient according to previously established guidelines[13] and a composite score was obtained by adding  $\Delta$ TX and DS3 (Tables 1&2). To assess the effect of the time of initiation of treatment for GD and the disease severity, the delay in ERT ( $\Delta$ TX) was plotted against DS3 for each patient. Pearson correlation coefficient shows a positive correlation between the two values with  $r$  value of 0.55 ( $P = 0.0018$ ) indicating that greater the delay in therapy, more severe are the disease symptoms (Fig 1A). Subjects were divided based on their DS3 scores to be mild to moderate ( $< 5$ ) and marked ( $> 6$ ) and plotted against their corresponding  $\Delta$ TX in years. Those with marked DS3 scores had higher  $\Delta$ TX than those with mild to moderate DS3 scores ( $P = 0.0036$ ) clearly showing that delay in initiation of therapy resulted in persistently higher manifestation of symptoms (Fig 1B).

### Immune abnormalities persist in patients with GD even after long term therapy

Flow cytometry based immunophenotyping was performed on peripheral blood cells from 26 GD patients as well as non-GD controls ( $n = 9$ ). The absolute numbers were found within the normal reference ranges. However, statistically significant alterations in percentages of specific immune subsets were observed and hence analyzed further. The results with relevant immune subsets are summarized in S1 Table. Lymphocytes were identified from whole blood by gating on CD45 + cells. Lymphocytes comprise of T-, B- and NK cells which were classified by

**Table 1. Demographic and clinical data from 31 GD patients enrolled into IRB approved study.**

| Subject no. | Sex | Genotype           | Age (yr) | Age at Symptom onset (SX) | Age at Treatment initiation (TX) | Years in Treatment | ΔTX = TX-SX | DS3 score | Composite score (ΔTX+DS3) |
|-------------|-----|--------------------|----------|---------------------------|----------------------------------|--------------------|-------------|-----------|---------------------------|
| 01†         | F   | N370S/N370S        | 41       | 15                        | 18                               | 23                 | 3           | 2         | 5                         |
| 02†         | M   | N370S/N370S        | 64       | 30                        | 42                               | 22                 | 12          | 9         | 21                        |
| 03          | F   | N370S/L444P        | 61       | 5                         | 41                               | 20                 | 36          | 13        | 49                        |
| 04          | M   | N370S/N370S        | 47       | 5                         | 40                               | 7                  | 35          | 9         | 44                        |
| 05          | F   | RecNci1/N370S      | 46       | 2                         | 40                               | 6                  | 38          | 13        | 51                        |
| 06†         | F   | N370S/N370S        | 45       | 18                        | 40                               | 5                  | 22          | 2         | 24                        |
| 07          | F   | R463C/RecNci1      | 63       | 13                        | 43                               | 20                 | 30          | 9         | 39                        |
| 08          | F   | N370S/N370S        | 64       | 33                        | 38                               | 26                 | 5           | 5         | 10                        |
| 09          | F   | N370S/N370S        | 57       | 26                        | 31                               | 26                 | 5           | 3         | 8                         |
| 10          | M   | N370S/N370S        | 60       | 39                        | 54                               | 6                  | 15          | 4         | 19                        |
| 11          | M   | N370S/N370S        | 68       | 18                        | 50                               | 18                 | 32          | 6         | 38                        |
| 12          | F   | RecNci1/R463C+Rec7 | 39       | 4                         | 12                               | 27                 | 8           | 11        | 19                        |
| 13          | F   | N370S/R496H        | 58       | 50                        | N/A                              | N/A                | 8*          | 4         | 12                        |
| 14          | F   | N370S/c.84insG     | 61       | 7                         | 34                               | 27                 | 27          | 15        | 42                        |
| 15†         | F   | N370S/N370S        | 25       | 4                         | 5                                | 20                 | 1           | 3         | 4                         |
| 16          | F   | N370S/L444P        | 35       | 7                         | 11                               | 24                 | 4           | 8         | 12                        |
| 17†         | F   | N370S/C23Y         | 42       | 11                        | 19                               | 23                 | 8           | 2         | 10                        |
| 18          | M   | N188S/S107L        | 19       | 1                         | 8                                | 11                 | 7           | 9         | 16                        |
| 19          | F   | L444P/L444P        | 21       | 1                         | 15                               | 6                  | 14          | 12        | 26                        |
| 20          | F   | N370S/R120Q        | 35       | 2                         | 6                                | 29                 | 4           | 8         | 12                        |
| 21          | F   | L444P/N370S        | 27       | 10                        | 12                               | 14                 | 2           | 2         | 4                         |
| 22          | F   | L444P/N370S        | 24       | 8                         | 9                                | 14                 | 1           | 2         | 3                         |
| 23          | M   | L444P/N370S        | 16       | 3                         | 11                               | 4                  | 8           | 2         | 10                        |
| 24          | M   | N370S/N370S        | 50       | 6                         | 40                               | 10                 | 34          | 6         | 40                        |
| 25          | M   | N370S/N370S        | 13       | N/A                       | N/A                              | N/A                | N/A         | 1         | 1                         |
| 26          | F   | L444P/R463C        | 52       | 5                         | 30                               | 22                 | 25          | 8         | 33                        |
| 27          | F   | N370S/R463C        | 35       | 3                         | 11                               | 24                 | 8           | 2         | 10                        |
| 28          | F   | N370S/R463C        | 37       | 5                         | 13                               | 24                 | 8           | 2         | 10                        |
| 29          | F   | N370S/R496H        | 9        | 4                         | N/A                              | N/A                | 5*          | 2         | 7                         |
| 30          | F   | L444P/L444P        | 20       | 0.5                       | 0.5                              | 19.5               | 0           | 8         | 8                         |
| 31          | F   | N370S/N370S        | 28       | 19                        | 19                               | 2**                | 7*          | 6         | 13                        |

Listed are the sex, causative genotype, age at onset of symptoms (SX), age at the start of treatment (TX). Delay in initiation of therapy (ΔTX) for GD was calculated as difference in years between the age at which the treatment was initiated and age of onset of symptoms (TX-SX). N/A: not applicable.

†: Not included in immunophenotyping analysis.

\*: Subjects who were not under any treatment for GD and hence ΔTX was calculated as difference in their age at the time of study and SX.

\*\* : Subject 31 discontinued the treatment after two years of therapy at the age of 21 yr. In this case, ΔTX was calculated as the number of years the subject remained untreated. Disease severity score was ascertained for each patient (DS3) and a composite score was obtained by adding ΔTX and DS3.

doi:10.1371/journal.pone.0168135.t001

positive expression of CD3, CD20 and CD16/CD56 respectively and as such their percentages together should add up to 100%. Dendritic cells were defined as lineage 1-negative (CD3, CD14, CD16, CD19, CD20 and CD56), CD34-negative, and HLA-DR positive and expressed as fraction of total leukocytes (WBCs).

Overall percentage of T cells did not differ between GD and normal controls (Fig 2A). However significant differences were observed when T cells were fractionated into CD4+T

**Table 2. Clinical evaluations and DS3 scoring.**

| Subject no. | Bone disease | Hematologic parameters | Visceral involvement |           | DS3 score |
|-------------|--------------|------------------------|----------------------|-----------|-----------|
|             |              |                        | Organomegaly         | Pulmonary |           |
| 01†         | 0            | +                      | +                    | 0         | 2         |
| 02†         | +++          | ++                     | Splenectomy          | 0         | 9         |
| 03          | +++          | +                      | Splenectomy          | +         | 13        |
| 04          | +++          | +                      | Splenectomy          | 0         | 9         |
| 05          | + / +++      | ++ / +++               | Splenectomy          | 0         | 13        |
| 06†         | +            | +                      | Splenectomy          | 0         | 2         |
| 07          | +++          | +                      | Splenectomy          | 0         | 9         |
| 08          | +            | +                      | +                    | 0         | 5         |
| 09          | +            | 0                      | +                    | 0         | 3         |
| 10          | +            | 0                      | +                    | 0         | 4         |
| 11          | ++           | +                      | +                    | 0         | 6         |
| 12          | +++          | +                      | Splenectomy          | +         | 11        |
| 13          | +            | +                      | 0                    | 0         | 4         |
| 14          | +++          | + / ++                 | Splenectomy          | 0         | 15        |
| 15†         | +            | +                      | +                    | 0         | 3         |
| 16          | +            | ++                     | ++                   | 0         | 8         |
| 17†         | 0            | +                      | +                    | 0         | 2         |
| 18          | ++           | +                      | + / ++               | +         | 9         |
| 19          | + / ++       | +                      | +                    | +         | 12        |
| 20          | ++           | +                      | +                    | 0         | 8         |
| 21          | +            | 0                      | +                    | 0         | 2         |
| 22          | +            | 0                      | +                    | 0         | 2         |
| 23          | +            | 0                      | +                    | 0         | 2         |
| 24          | ++           | +                      | ++                   | 0         | 6         |
| 25          | +            | 0                      | +                    | 0         | 1         |
| 26          | ++           | +                      | Splenectomy          | 0         | 8         |
| 27          | +            | 0                      | +                    | 0         | 2         |
| 28          | +            | 0                      | +                    | 0         | 2         |
| 29          | +            | 0                      | +                    | 0         | 2         |
| 30          | + / ++       | +                      | +                    | +         | 8         |
| 31          | ++           | ++                     | ++                   | 0         | 6         |

Clinical domains including bone disease, hematologic parameters and visceral involvement (adapted from Gaucher disease severity scoring instrument (DS3) were scored for each patient. A relative disease activity score was assigned as mild (+), moderate (++) and severe (+++) according to the numerical composite score for each domain. Note that (+) denotes the presence of pulmonary involvement.

doi:10.1371/journal.pone.0168135.t002

helper cells (Th cells) and CD8+ cytotoxic T cells (Tc cells). A significant decrease in CD4+ cells were observed in GD patients ( $P = 0.0075$ ), while there was a corresponding increase in CD8+ cells ( $P = 0.0011$ ) (Fig 2B&2C). CD4/CD8 ratio was then calculated as ratio of CD4+ T helper cells to CD8+ cytotoxic T cells. Lower CD4/CD8 ratio can suggest chronic inflammation or perturbation in the immune system and is observed in conditions like viral infections and immune reconstitution inflammatory syndrome [20–22]. Interestingly, GD patients showed significantly lower ( $P = 0.0008$ ) CD4/CD8 ratio compared to normal controls (Fig 2D). Memory CD4 and CD8 T cells were assayed by presence of memory cell marker CD45RO. While no change in memory CD4 T cells was observed, GD patients showed much higher number of memory CD8 T cells ( $P = 0.0028$ ) (Fig 2E&2F).

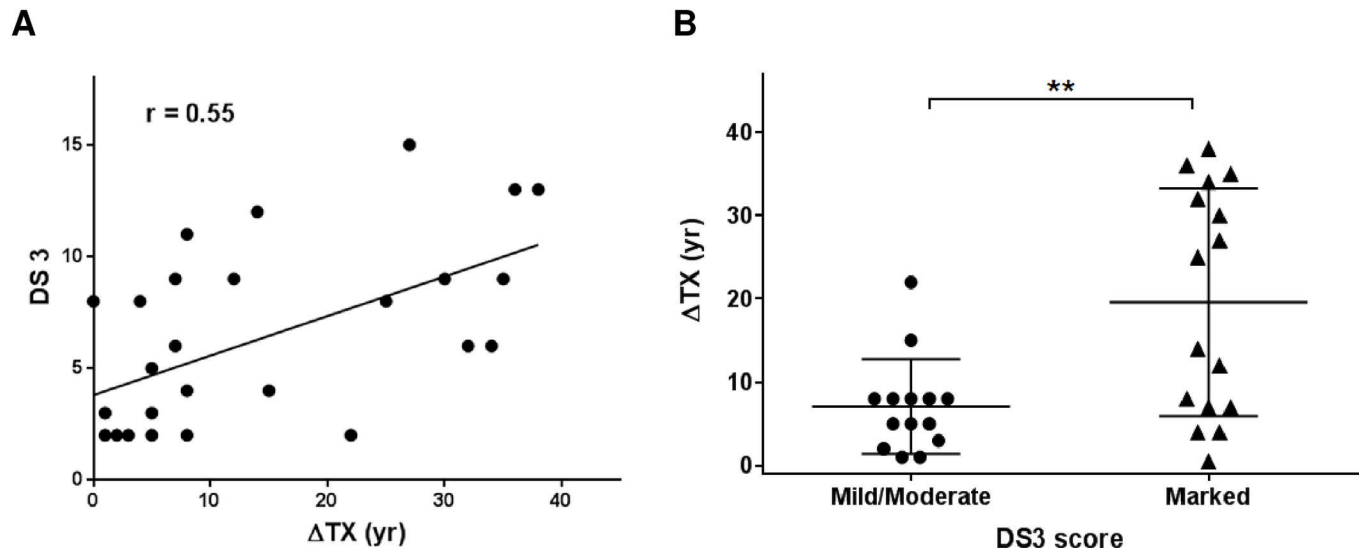

**Fig 1. Correlation between delay in treatment initiation and disease severity scores.** Delay in initiation of treatment for GD ( $\Delta$ TX) was plotted against disease severity score (DS3) for each patient. The trend line shows a positive Pearson correlation coefficient between the two values ( $r$  value = 0.55,  $P = 0.0018$ ) (A). Subjects were divided based on their DS3 scores as being mild/moderate ( $DS3 < 5$ ) or marked ( $DS3 > 6$ ) and their  $\Delta$ TX values were plotted. Unpaired Student's t-test revealed  $P$  value = 0.0036 (\*\*) indicating very significant difference (B).

doi:10.1371/journal.pone.0168135.g001

CD4 and CD8 T cells were further analyzed for chemokine receptors CCR4 and CXCR3 and CCR6, and CRTH2. Th cells from GD patients showed no significant changes between the two groups (Fig 3A–3D). In contrast, all of these markers were significantly higher on CD8 T cells (Fig 3E–3H). In addition, memory T cells were also investigated further for co-expression of inflammatory chemokine receptors CCR4, CCR5, CCR6 which are thought to define separate functional subsets Th2, Th1 and Th17 cells respectively [23, 24]. Increase in number of cells expressing CCR6 along with CCR4 and CCR5 was observed in GD compared to normal controls with a corresponding decrease in the fraction of CCR6<sup>+</sup> cells (Fig 4A–4E).

B lymphocytes were identified by the expression of CD20 marker, while CD5 and CD27 were used as B cell activation and memory markers. While an overall decrease in B cells was observed in GD patients ( $P = 0.022$ ), no significant changes were seen in activated and memory B cells (Fig 5A–5C). Immature, transitional and mature/marginal zone B cells were differentiated by the level of CD21 expression on CD20<sup>+</sup> cells. Mature B cells show high level of CD21 expression (CD21<sup>Hi</sup>/CD20<sup>+</sup>) while immature B cells are enumerated as CD21<sup>Lo</sup>/CD20<sup>+</sup> cells. There is a population of cells within peripheral blood with intermediate level of CD21 expression (CD21<sup>Dim</sup>/CD20<sup>+</sup>) which represents transitional B cells. When CD21<sup>Dim</sup> cells were plotted for GD and controls, no significant change is observed when compared between the two groups. However, closer look at individual data points indicates a subgroup within GD patients which showed higher fraction of CD21<sup>Dim</sup> cells indicating that in that subgroup of GD patients, defect in B cell maturation are observed (Fig 5D). B cells were then sub-divided into those producing each class of immunoglobulins, IgA, IgD, IgM and IgG. Initial observation noted a significantly higher IgG producing B cells in GD patients ( $P = 0.046$ ), taking into consideration individual data points, there seem to be a trend for increased IgA producing cells and reduced IgD and IgM producing B cells (Fig 5E–5H).

Natural killer cells (NK cells) are identified as CD45<sup>+</sup> lymphocytes that express CD16 or CD56 and lack CD3 expression. No significant change in NK cell fraction was seen between GD and control groups, even though there seems to be a trend of increased NK cells in GD

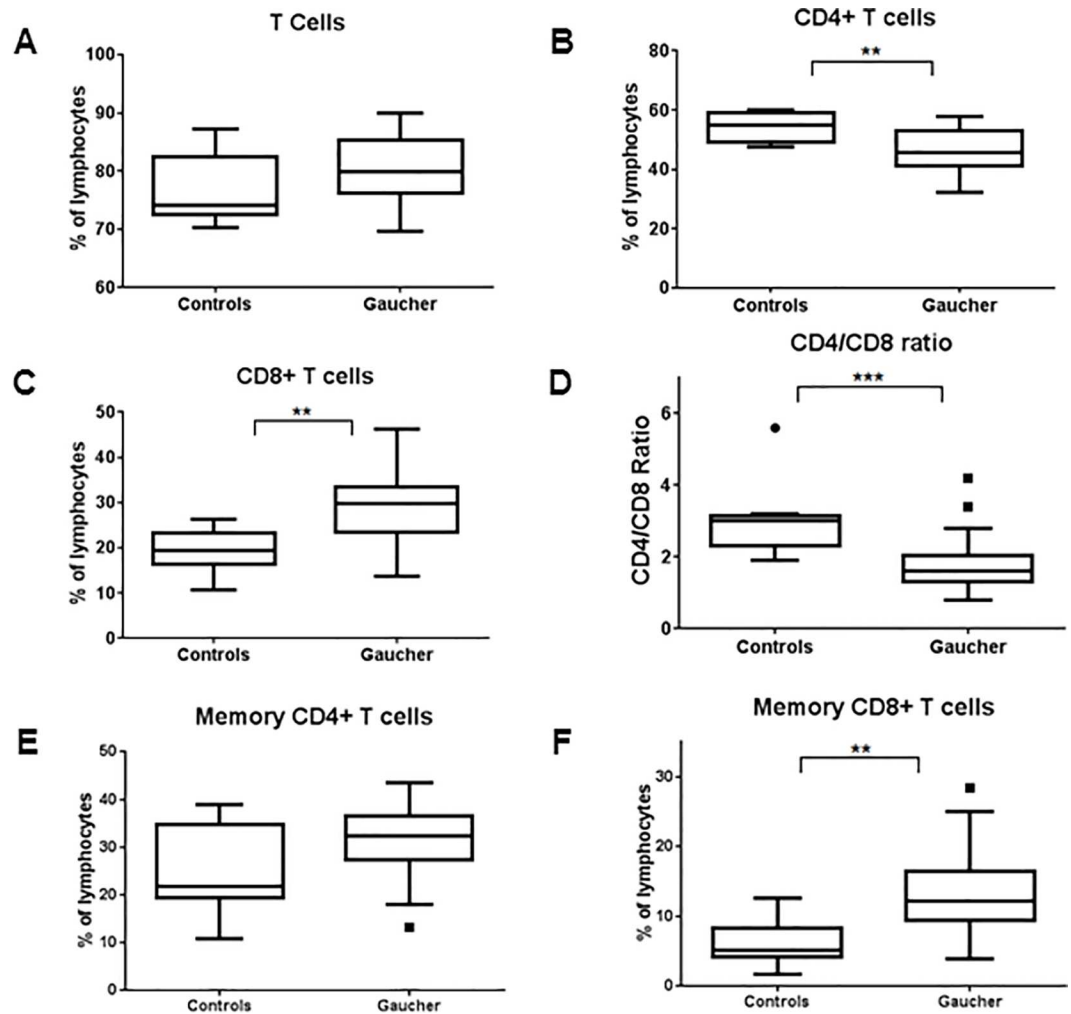

**Fig 2. T-lymphocytes and subsets in GD patients.** T-lymphocytes (CD3+) from peripheral blood of GD patients and normal controls were assessed using flow cytometry and plotted as fraction of total lymphocytes (A). T helper cells (CD3+/CD4+) (B) and cytotoxic T cells (CD3+/CD8+) (C) were calculated and a ratio of CD4 to CD8 cells was plotted (D). Similarly memory subsets of CD4 (CD3+/CD4+/CD45RO+) and CD8 T cells (CD3+/CD8+/CD45RO+) were calculated and plotted against normal controls (E, F). Unpaired student's t-test was performed to calculate significance values and included in the plots where significant difference between GD and normal controls was observed.

doi:10.1371/journal.pone.0168135.g002

(Fig 6A). CD3 expressing NK cell fraction was markedly higher in GD group compared to non GD controls ( $P = 0.0053$ ) (Fig 6B). The invariant NKT cells (iNKT cells) are a subgroup of NKT cells which express an invariant T cell receptor  $\alpha$ -chain,  $V\alpha 24-J\alpha 18$ . Subgroups of iNKT cells expressing CD4 and CD8 are both significantly increased in the GD group (Fig 6C&6D). Dendritic cells were identified as those leukocytes which are lineage-1 negative (CD3, CD14, CD16, CD19, CD20 and CD56 negative), CD34 negative and HLA DR positive. DCs were further classified as myeloid and plasmacytoid DCs by their expression of CD11c or BDCA2 respectively. No significant change in DC fraction was observed between GD and control group however in a subgroup of GD patients there were no or very low DCs (Fig 6E) There were no overall significant changes in myeloid and plasmacytoid DC numbers as well (Fig 6F&6G).

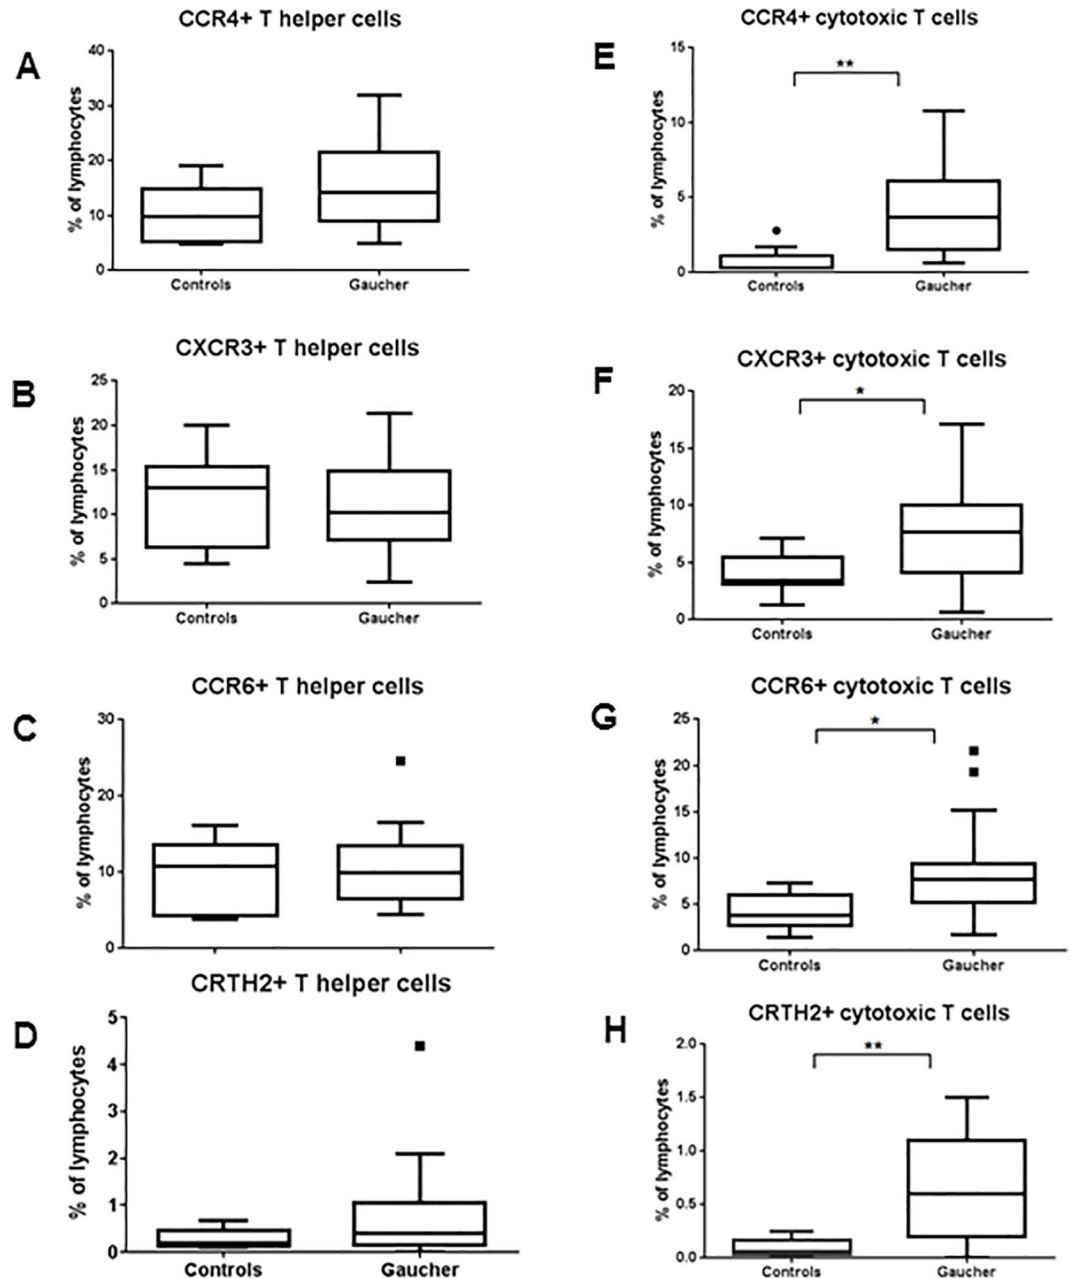

**Fig 3. Activation markers in Th and Tc cells.** CD4+ T (A) and CD8+ T cells (B) were further analyzed for expression of activation markers (CCR4, CXCR3), chemokine receptor (CCR6) and chemoattractant (CRTH2) which play a role in T-cell mediated inflammation.

doi:10.1371/journal.pone.0168135.g003

### Time of initiation of therapy (ERT) and disease severity correlate with persistent immune alterations in GD

GD patients were subdivided into two groups based on whether they showed persistent immune alterations which include one or more of the following B-lymphocyte abnormalities: overall decrease in B cell fraction, increased IgA or IgG producing subclasses, B cell maturation defects as seen by abnormal increase in number of B cells expressing low CD21 marker and corresponding decrease in CD21+ B cells. Individual  $\Delta$ TX, DS3 scores as well as combined



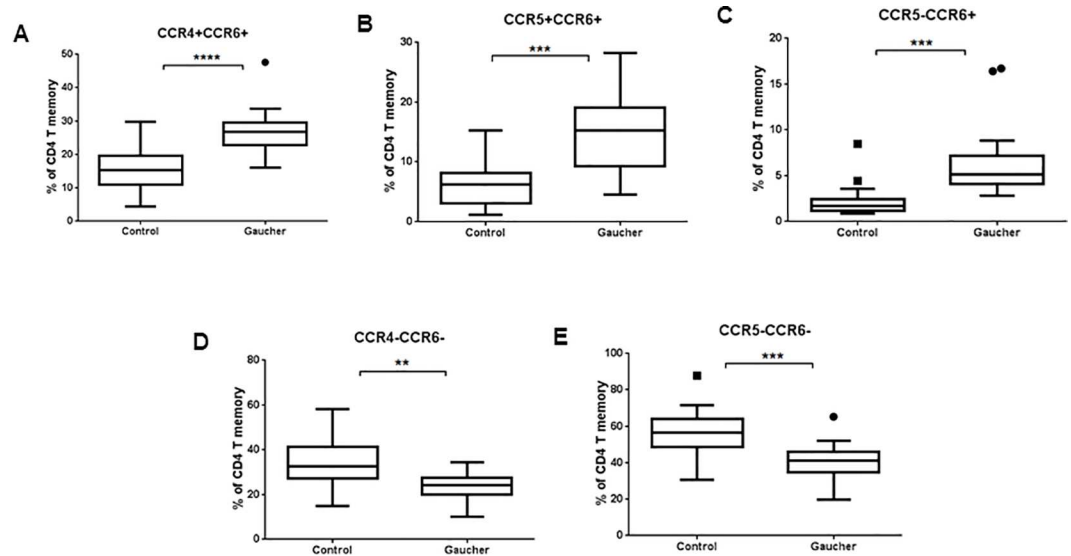

**Fig 4. Inflammatory cytokine expression on T cells.** Memory T cells were further analyzed for co-expression of inflammatory chemokine receptors (CCR4, CCR5 and CCR6) which play a role in T cell mediated inflammation.

doi:10.1371/journal.pone.0168135.g004

scores were plotted for the two groups: patients manifesting B cell abnormalities or those who were not.  $\Delta$ TX of the group with B cell immune alterations was significantly higher ( $P = 0.0028$ ) compared to those lacking B cell abnormalities indicating that delay in the initiation of therapy has profound effect on persistent B cell alterations in GD patients. Similar effect was found with DS3 scores ( $P = 0.01$ ) as well as combined scores ( $P = 0.01$ ) for each group (Fig 7A). When similar analysis was performed by subdividing the GD patients based on their overall T cell abnormalities, which included skewed T4/T8 ratio, abnormally high CD8 fraction, or increased number of activated T cells, no significant effect of either  $\Delta$ TX or DS3 was observed (Fig 7B). There was no significant difference between the patients with or without the NKT cell alterations in patients with different  $\Delta$ TX and DS3 (Fig 7C). These results suggest that T cell and NKT cell abnormalities in GD patients are not profoundly affected by the delay in treatment initiation. GD patients were further sub-grouped based on presence or absence of normal range of dendritic cells and analyzed for their  $\Delta$ TX. There is a highly significant correlation ( $P < 0.0001$ ) between the reduced number of DCs and delay in treatment initiation. Similar effect was seen with combined score ( $P = 0.0034$ ) (Fig 7D).

### Delay in treatment initiation affects various immune cell subsets in GD patients

GD patients were sub-divided into those who received early (<7 yr.) vs. delayed (>8 yr.) intervention after the onset of symptoms and plotted for affected immune phenotypes as seen above. Transitional B cells as seen by CD20/ CD21<sup>Dim</sup> expression were higher in patients with delayed ERT compared to those with early intervention. IgA-producing B cells were also reduced as a result of early ERT ( $P = 0.0046$ ) (Fig 8A and 8B). The change in NKT cell fraction was less prominent between the groups with early and delayed ERT while the effect on DCs percentages was much more pronounced ( $P = 0.0017$ ) (Fig 8C and 8D). Taken together these results indicate that initiating the therapy early in GD patients helps to revert some of the long term immune cell abnormalities.

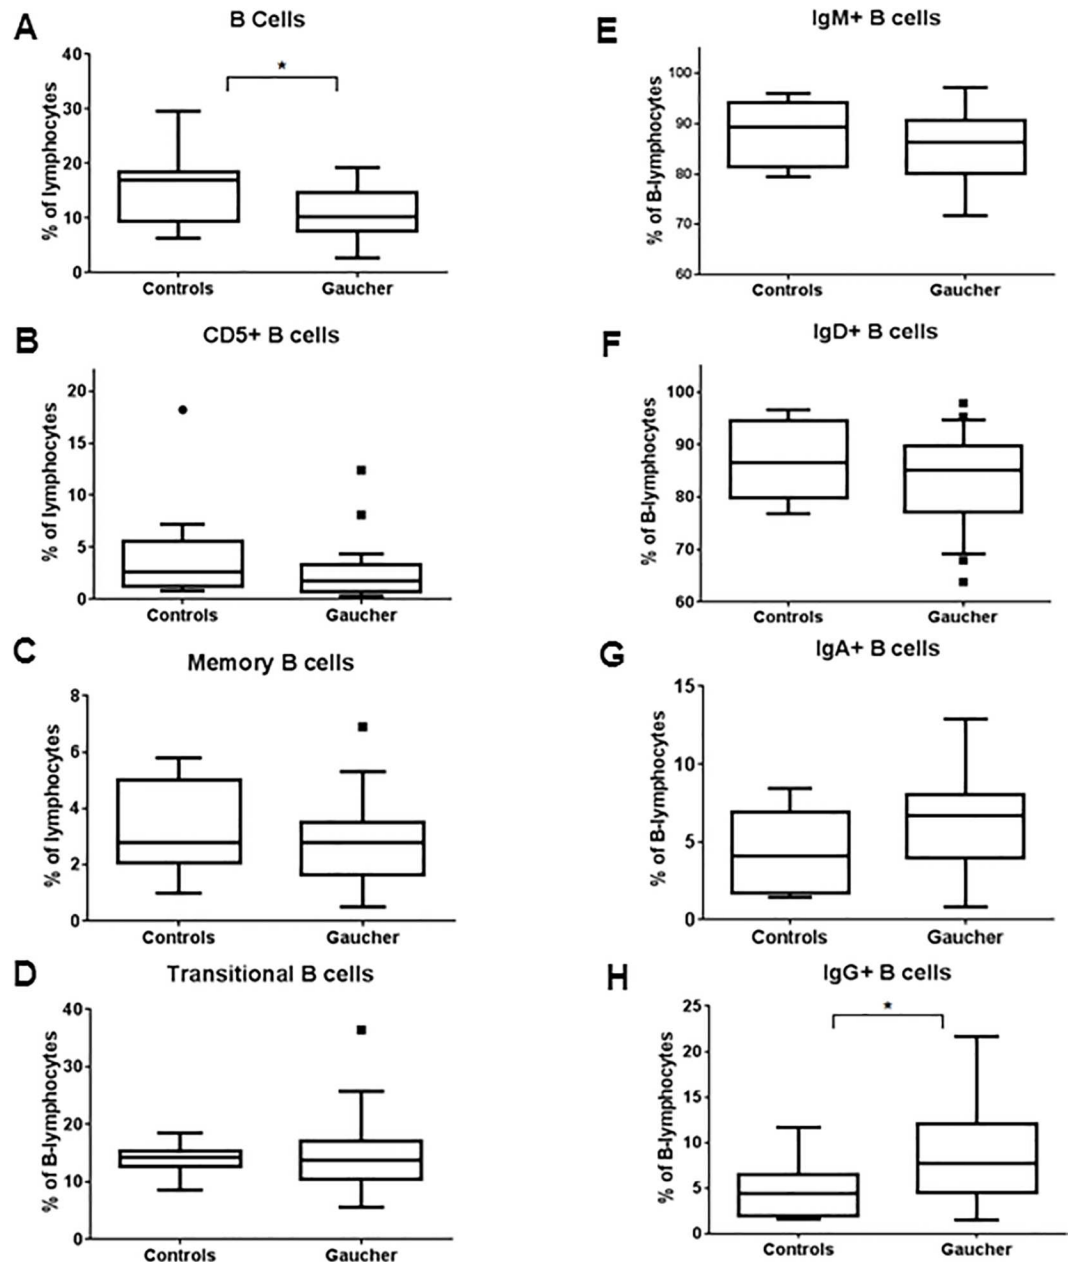

**Fig 5. B-lymphocytes and subsets in GD patients.** Percentage of B-lymphocytes (CD20+) from total lymphocytes of GD patients and normal controls were assessed using flow cytometry and plotted (A). B cells were further analyzed for presence of activation markers (CD5 and CD27). CD21 was used as B cell maturation marker where CD20+/CD21+ cells represented mature B cells while CD20+/CD21<sup>Dim</sup> represent transitional B cells (A-D). B cells were subdivided into those producing individual immunoglobulins (IgA, IgG, IgM, and IgG) in GD patients and normal controls and plotted as % of B-lymphocytes (E-F).

doi:10.1371/journal.pone.0168135.g005

### Discussion

Most of the studies exploring immune irregularities in GD have been focused on dysregulation of macrophages due to the fact that the accumulation of sphingolipids is most prominent in cells of monocyte/macrophage lineage [1]. Prior B cell associated studies in GD patients have been focused on B cell malignancies and myelomas [4, 25]. However it is important to

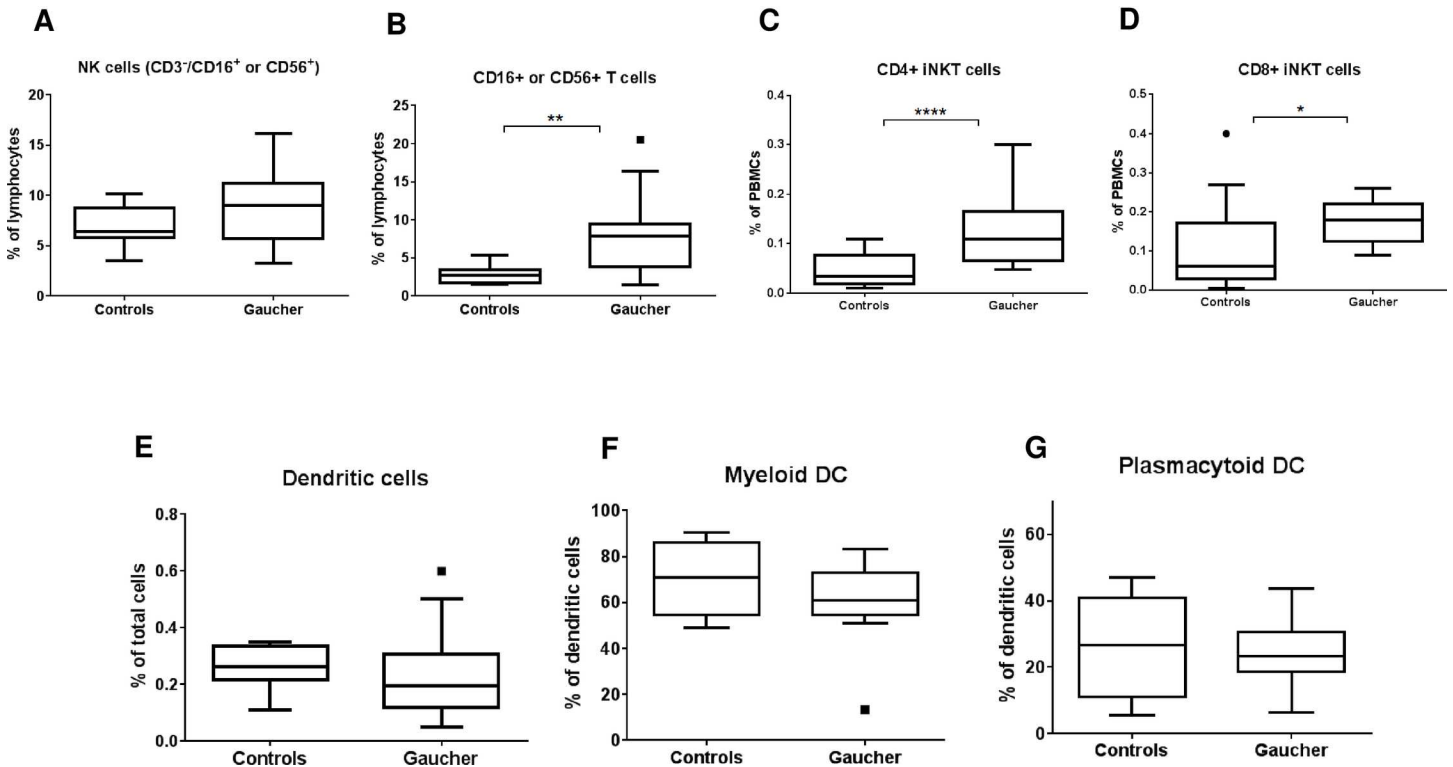

**Fig 6. NK/NKT and dendritic cells in GD patients.** NK cells (CD3<sup>-</sup>/CD16<sup>+</sup> or CD56<sup>+</sup>), NKT cells (CD3<sup>+</sup>/CD16<sup>+</sup> or CD56<sup>+</sup>) and invariant NKT cells (iNKT, CD3<sup>+</sup>, Vα24Ja18<sup>+</sup>, CD4<sup>+</sup>/CD8<sup>+</sup>) from peripheral blood of GD patients and normal controls were assessed using flow cytometry and plotted as percentage of total lymphocytes (A-D). Dendritic cells were enumerated as Lin<sup>-</sup>/CD34<sup>-</sup>/HLA DR<sup>+</sup> cells and plotted as a percentage of total leukocytes/WBCs (E). Dendritic cells were further fractionated as myeloid DCs or plasmacytoid DCs based on expression of CD11c and BDCA2 respectively and plotted as percentage of DCs (F&G).

doi:10.1371/journal.pone.0168135.g006

investigate how various cell types in innate and adaptive immune system are affected to better understand the cellular pathophysiology of GD. A systematic clinical study involving detailed immunophenotyping of individual GD patients revealed that long term and persistent alterations exist in all major immune components albeit significant effects are seen in certain subsets. While there were abnormalities observed in overall number of B and T-lymphocytes, NKT cells and dendritic cells are affected as well. In addition, significant differences were also seen in activated T cells, memory markers as well as B cell maturation and development of memory B cells are affected as well. Overall increase in CD20<sup>+</sup>/CD27<sup>+</sup> fraction indicates impaired development of memory B cells in GD patients. IgM producing B cells were in similar range compared to non GD controls, however there were marked alterations in IgA and IgG producing B-cells. However, pneumococcal titers for a majority of patients were found to be in the normal range (data not shown) thus ruling out antibody deficiencies *per se*. CD3<sup>+</sup> T cells were assayed for various additional markers revealing interesting differences between GD and control groups. There was a reduction in CD4<sup>+</sup> T helper cells with a corresponding increase in CD8<sup>+</sup> cytotoxic T cells thus skewing the CD4/CD8 ratio which is generally considered as an indicative of immune health. Assays that include T cell activation markers revealed an overall increase in activated T cells as well as increase expression of chemokine markers in GD patient group. While B-cell malignancies are definitely a concern in GD patients; our study highlights the fact that irrespective of clinical manifestations, there are multiple persistent abnormalities pertaining to immune system in GD patients.

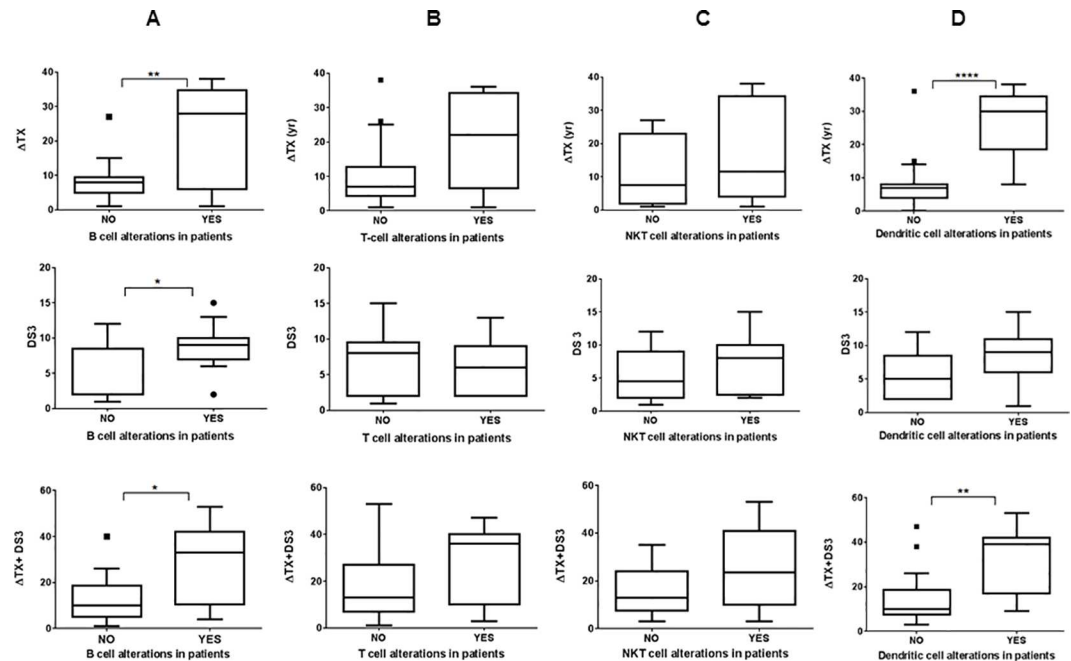

**Fig 7. Correlation between immune alterations and  $\Delta$ TX, DS3 and combined scores.** GD patients were sub-categorized based on whether or not they show persistent B-cell (A), T-cell (B), NKT cells (CD16/CD56+ T cells) (C) and dendritic cell (D) immune alterations and plotted against the delay in initiation of ERT ( $\Delta$ TX), disease severity (DS3) and a combined score ( $\Delta$ TX+DS3).

doi:10.1371/journal.pone.0168135.g007

In order to better understand the basis of persistent multiple immune irregularities, we subdivided the GD group into those manifesting significant immune alterations and those which do not carry any, and analyzed the time of disease onset and delay in therapy initiation ( $\Delta$ TX) in each subgroup. In case of T cell abnormalities, even though there is a trend, there is no statistically significant correlation with  $\Delta$ TX. However, in all other cell types including B-lymphocytes and DCs, a significant correlation was observed with  $\Delta$ TX. We then found similar results using DS3 and combined score values as well indicating that having immune alterations contributes to overall disease manifestation and severity in spite of continuing ERT. While dendritic cells primarily act as antigen presenting cells, they have been shown to play important roles in activating T-lymphocytes [26, 27]. Reduced number of circulating DCs has been indicated in various disease states including immune disorders [28]. We observed a strong correlation between reduced DCs in patients with severe GD pathology even though the exact mechanism it yet to be elucidated. Alternately the GD group was divided into those who received early ERT compared to delayed ERT and looked for persistence of various immune alterations in each group. As expected, early initiation of therapy was found to reverse most of the immune alterations. Our study highlights the severity of immune abnormalities and its correlation with manifestation of symptoms in GD patients and advocates initiating treatment early in order to reverse these irregularities and avoid persistent effects.

A small cohort size and broad definitions, such as the treatment lag ( $\Delta$ TX) in clinical assessments are some of the limitations. However, this study data demonstrates that there are quantitative variations in immunologic cell types existing in patients with GD who are receiving ERT. Patients who were diagnosed before and started therapy after the advent of ERT, thus already had significant disease load and suffering from complications, especially of skeletal in origin. Patients diagnosed after the advent of ERT were able to start receiving ERT before the

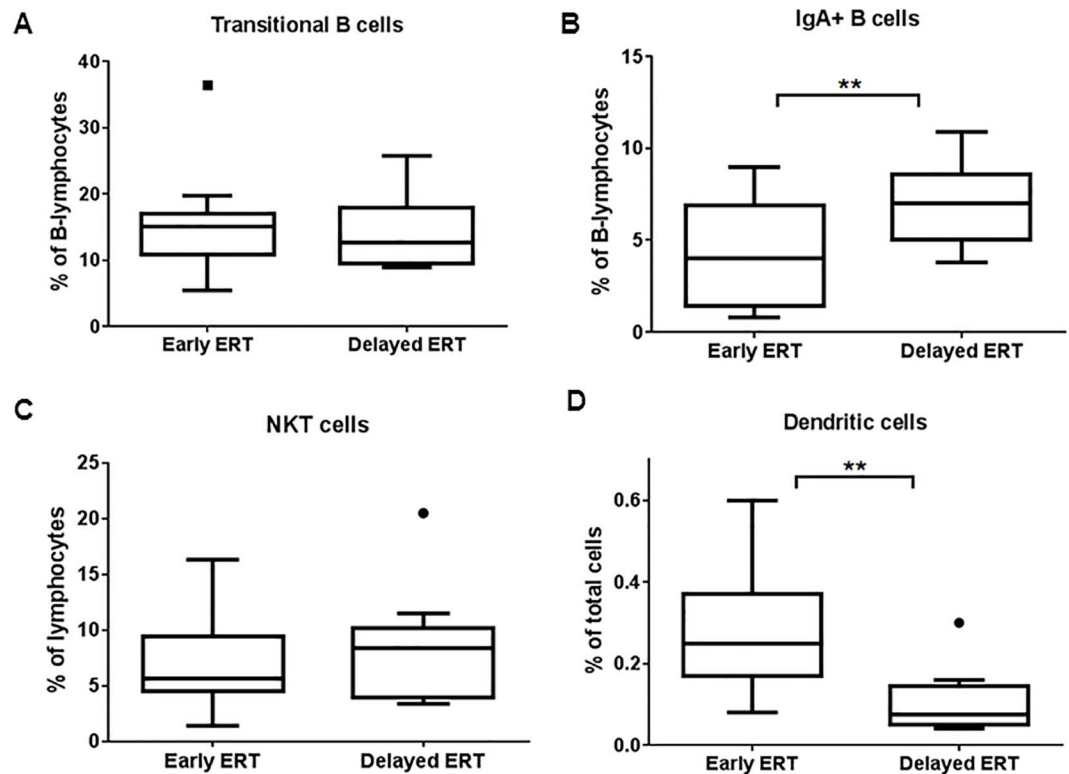

**Fig 8. Effect of early or delayed therapy on immune irregularities.** GD patients were sub-divided into those who received early vs. delayed intervention after their diagnosis and plotted for specific immune phenotypes. B cell transitional cells expressed as CD21<sup>Dim</sup> (A), IgA producing B cells (B), NKT cells (C) and dendritic cell (D) percentages in GD patients with delayed or early intervention are plotted.

doi:10.1371/journal.pone.0168135.g008

severe complications ensued. Given that there are limitations of ERT for access to different tissues and organs, the outcome measures currently in use have similar limited expectations, whilst only less than half of the treated patients achieve all established treatment goals. Compared to earlier, currently there are more individuals being identified with GBA mutations at asymptomatic or minimally symptomatic stages, and more patients with GD who were able to start therapy soon after their diagnosis in childhood. Finally, while GD is not a primary immunologic disorder, the involvement and permanent changes in multiple immune cell lineages expand the effects of the sphingolipid metabolism and/or GBA mutations beyond the macrophage lineage.

## Supporting Information

**S1 Fig. Flow cytometry analysis to identify lymphocyte subpopulations.** Peripheral blood cells expressing high CD45 were gated as lymphocytes. T- and B-lymphocyte fractions were enumerated based on the expression of CD3 and CD20 markers respectively. Similarly, NK cells were identified as those expressing either CD16 or CD56 while being negative for CD3 expression. (TIF)

**S2 Fig. Subpopulations within T-lymphocytes.** T cells were gated based on CD3 expression and further classified into cytotoxic T cells (Tc) and T helper cells (Th) based on the markers CD8 and CD4 respectively. Memory CD8 and CD4 T cells were identified based on CD45RO

expression. Expression of CD194 and CD183 in each of the T cell fractions is noted. (TIF)

**S3 Fig. Subpopulations within B-lymphocytes.** Activated B cells were identified as CD20<sup>+</sup> cells expressing activation markers CD5 or CD20. Level of CD21 coexpression on CD20<sup>+</sup> cells was used to mark B cell stages. CD20/CD21<sup>Hi</sup> cells are mature B cells while CD20/CD21<sup>dim</sup> cells indicate transitional B cells. (TIF)

**S4 Fig. B cell fractions producing various immunoglobulin (Ig) subtypes.** B cells were gated based on either CD20 or CD19 expression, which are coexpressed on almost B cells. Mature B cells producing individual immunoglobulin subtypes are identified by surface expression of those Igs. (TIF)

**S5 Fig. Dendritic cells and subpopulations.** Dendritic cells were identified as cells with are negative for lineage cocktail (CD3, CD14, CD16, CD19, CD20, CD56) and CD34 while expressing HLA-DR. DCs are further classified into myeloid and plasmacytoid DCs based on CD11c and BDCA expression respectively. (TIF)

**S1 Table. Immunophenotyping results in GD subjects and controls.** Immune subsets from immunophenotyping using flow cytometry are presented. All the results, except CD4/CD8 ratio are expressed as percentages. T-, B- and NK cells are all expressed as fraction of peripheral blood lymphocytes (CD45<sup>+</sup>). Dendritic cells are shown as percentage of total leukocytes. (TIF)

## Author Contributions

**Conceptualization:** OGA.

**Formal analysis:** RPL LK CA.

**Funding acquisition:** OGA.

**Investigation:** RPL CI MR LK LA CA OGA.

**Methodology:** RPL MP DU OA.

**Project administration:** RPL CI OGA.

**Resources:** MP DU OA OGA.

**Supervision:** RPL DU OGA.

**Writing – original draft:** RPL OGA.

**Writing – review & editing:** DU OA.

## References

1. Pandey MK, Grabowski GA. Immunological cells and functions in Gaucher disease. *Critical reviews in oncogenesis*. 2013; 18(3):197–220. PubMed Central PMCID: PMC3661296. PMID: [23510064](#)
2. Thomas AS, Mehta A, Hughes DA. Gaucher disease: haematological presentations and complications. *British journal of haematology*. 2014; 165(4):427–40. Epub 2014/03/05. doi: [10.1111/bjh.12804](#) PMID: [24588457](#)

3. Ayto R, Hughes DA. Gaucher disease and myeloma. *Crit Rev Oncog*. 2013; 18(3):247–68. Epub 2013/03/21. PMID: [23510067](#)
4. Pavlova EV, Wang SZ, Archer J, Dekker N, Aerts JM, Karlsson S, et al. B cell lymphoma and myeloma in murine Gaucher's disease. *The Journal of pathology*. 2013; 231(1):88–97. doi: [10.1002/path.4227](#) PMID: [23775597](#)
5. Pandey MK, Jabre NA, Xu YH, Zhang W, Setchell KD, Grabowski GA. Gaucher disease: chemotactic factors and immunological cell invasion in a mouse model. *Mol Genet Metab*. 2014; 111(2):163–71. Epub 2013/10/02. doi: [10.1016/j.ymgme.2013.09.002](#) PMID: [24079945](#)
6. Pandey MK, Rani R, Zhang W, Setchell K, Grabowski GA. Immunological cell type characterization and Th1-Th17 cytokine production in a mouse model of Gaucher disease. *Mol Genet Metab*. 2012; 106(3):310–22. Epub 2012/05/19. PubMed Central PMCID: [PMCPmc3382074](#). doi: [10.1016/j.ymgme.2012.04.020](#) PMID: [22595426](#)
7. Goker-Alpan O. Optimal therapy in Gaucher disease. *Therapeutics and clinical risk management*. 2010; 6:315–23. PubMed Central PMCID: [PMC2909498](#). PMID: [20668714](#)
8. Bennett LL, Mohan D. Gaucher disease and its treatment options. *The Annals of pharmacotherapy*. 2013; 47(9):1182–93. Epub 2013/11/22. doi: [10.1177/1060028013500469](#) PMID: [24259734](#)
9. Zimran A, Elstein D. Management of Gaucher disease: enzyme replacement therapy. *Pediatric endocrinology reviews: PER*. 2014; 12 Suppl 1:82–7.
10. Pastores GM, Weinreb NJ, Aerts H, Andria G, Cox TM, Giral M, et al. Therapeutic goals in the treatment of Gaucher disease. *Seminars in hematology*. 2004; 41(4 Suppl 5):4–14. Epub 2004/10/07.
11. Charrow J, Scott CR. Long-term treatment outcomes in Gaucher disease. *American journal of hematology*. 2015; 90 Suppl 1:S19–24.
12. Weinreb N, Taylor J, Cox T, Yee J, vom Dahl S. A benchmark analysis of the achievement of therapeutic goals for type 1 Gaucher disease patients treated with imiglucerase. *American journal of hematology*. 2008; 83(12):890–5. Epub 2008/09/27. doi: [10.1002/ajh.21280](#) PMID: [18819093](#)
13. Weinreb NJ, Cappellini MD, Cox TM, Giannini EH, Grabowski GA, Hwu WL, et al. A validated disease severity scoring system for adults with type 1 Gaucher disease. *Genetics in medicine: official journal of the American College of Medical Genetics*. 2010; 12(1):44–51.
14. Weinreb NJ, Finegold DN, Feingold E, Zeng Z, Rosenbloom BE, Shankar SP, et al. Evaluation of disease burden and response to treatment in adults with type 1 Gaucher disease using a validated disease severity scoring system (DS3). *Orphanet journal of rare diseases*. 2015; 10:64. Epub 2015/05/23. PubMed Central PMCID: [PMCPmc4471923](#). doi: [10.1186/s13023-015-0280-3](#) PMID: [25994334](#)
15. Mistry PK, Deegan P, Vellodi A, Cole JA, Yeh M, Weinreb NJ. Timing of initiation of enzyme replacement therapy after diagnosis of type 1 Gaucher disease: effect on incidence of avascular necrosis. *British journal of haematology*. 2009; 147(4):561–70. Epub 2009/09/08. PubMed Central PMCID: [PMCPmc2774157](#). doi: [10.1111/j.1365-2141.2009.07872.x](#) PMID: [19732054](#)
16. Mistry PK, Sadan S, Yang R, Yee J, Yang M. Consequences of diagnostic delays in type 1 Gaucher disease: the need for greater awareness among hematologists-oncologists and an opportunity for early diagnosis and intervention. *American journal of hematology*. 2007; 82(8):697–701. Epub 2007/05/12. doi: [10.1002/ajh.20908](#) PMID: [17492645](#)
17. Baumgarth N, Roederer M. A practical approach to multicolor flow cytometry for immunophenotyping. *Journal of immunological methods*. 2000; 243(1–2):77–97. PMID: [10986408](#)
18. Sønder SU, Limgala RP, Ivanova MM, Ioanou C, Plassmeyer M, Marti GE, et al. Persistent immune alterations and comorbidities in splenectomized patients with Gaucher disease. *Blood Cells, Molecules, and Diseases*. 2016; 59:8–15. doi: [10.1016/j.bcmd.2016.02.003](#) PMID: [27282561](#)
19. Rawlings SA, Alonzo F 3rd, Kozhaya L, Torres VJ, Unutmaz D. Elimination of HIV-1-Infected Primary T Cell Reservoirs in an In Vitro Model of Latency. *PloS one*. 2015; 10(5):e0126917. Epub 2015/05/23. PubMed Central PMCID: [PMCPmc4437782](#). doi: [10.1371/journal.pone.0126917](#) PMID: [25993666](#)
20. Lu W, Mehraj V, Vyboh K, Cao W, Li T, Routy JP. CD4:CD8 ratio as a frontier marker for clinical outcome, immune dysfunction and viral reservoir size in virologically suppressed HIV-positive patients. *Journal of the International AIDS Society*. 2015; 18:20052. Epub 2015/07/02. PubMed Central PMCID: [PMCPmc4486418](#). doi: [10.7448/IAS.18.1.20052](#) PMID: [26130226](#)
21. Ratnam I, Chiu C, Kandala NB, Easterbrook PJ. Incidence and risk factors for immune reconstitution inflammatory syndrome in an ethnically diverse HIV type 1-infected cohort. *Clinical infectious diseases: an official publication of the Infectious Diseases Society of America*. 2006; 42(3):418–27. Epub 2006/01/05.
22. Serrano-Villar S, Deeks SG. CD4/CD8 ratio: an emerging biomarker for HIV. *The lancet HIV*. 2015; 2(3):e76–7. Epub 2015/10/02. doi: [10.1016/S2352-3018\(15\)00018-1](#) PMID: [26424546](#)

23. El Hed A, Khaitan A, Kozhaya L, Manel N, Daskalakis D, Borkowsky W, et al. Susceptibility of human Th17 cells to human immunodeficiency virus and their perturbation during infection. *The Journal of infectious diseases*. 2010; 201(6):843–54. Epub 2010/02/11. PubMed Central PMCID: PMC2849315. doi: [10.1086/651021](https://doi.org/10.1086/651021) PMID: [20144043](https://pubmed.ncbi.nlm.nih.gov/20144043/)
24. Ramesh R, Kozhaya L, McKeivitt K, Djuretic IM, Carlson TJ, Quintero MA, et al. Pro-inflammatory human Th17 cells selectively express P-glycoprotein and are refractory to glucocorticoids. *The Journal of experimental medicine*. 2014; 211(1):89–104. Epub 2014/01/08. PubMed Central PMCID: PMC3892977. doi: [10.1084/jem.20130301](https://doi.org/10.1084/jem.20130301) PMID: [24395888](https://pubmed.ncbi.nlm.nih.gov/24395888/)
25. Rodic P, Pavlovic S, Kostic T, Suvajdzic Vukovic N, Djordjevic M, Sumarac Z, et al. Gammopathy and B lymphocyte clonality in patients with Gaucher type I disease. *Blood Cells Mol Dis*. 2013; 50(3):222–5. Epub 2012/12/26. doi: [10.1016/j.bcmd.2012.11.012](https://doi.org/10.1016/j.bcmd.2012.11.012) PMID: [23265739](https://pubmed.ncbi.nlm.nih.gov/23265739/)
26. Hemann EA, Legge KL. Peripheral regulation of T cells by dendritic cells during infection. *Immunol Res*. 2014; 59(1–3):66–72. Epub 2014/05/20. doi: [10.1007/s12026-014-8530-3](https://doi.org/10.1007/s12026-014-8530-3) PMID: [24838143](https://pubmed.ncbi.nlm.nih.gov/24838143/)
27. Hivroz C, Chemin K, Tourret M, Bohineust A. Crosstalk between T lymphocytes and dendritic cells. *Crit Rev Immunol*. 2012; 32(2):139–55. Epub 2012/12/12. PMID: [23216612](https://pubmed.ncbi.nlm.nih.gov/23216612/)
28. Mackern-Oberti JP, Llanos C, Vega F, Salazar-Onfray F, Riedel CA, Bueno SM, et al. Role of dendritic cells in the initiation, progress and modulation of systemic autoimmune diseases. *Autoimmun Rev*. 2015; 14(2):127–39. Epub 2014/12/03. doi: [10.1016/j.autrev.2014.10.010](https://doi.org/10.1016/j.autrev.2014.10.010) PMID: [25449681](https://pubmed.ncbi.nlm.nih.gov/25449681/)
